# Supplementary material for: Authenticity assessment of anabolic androgenic steroids in counterfeit drugs by1H NMR
Source: Royal Society of Chemistry journal article supplement (doi:10.1039/c8ay00158h), 2018-01-01
Supplement: c8ay00158h1.pdf [file c8ay00158h1.pdf]

## Supplementary Information

### Authenticity assessment of anabolic androgenic steroids in counterfeit drugs by <sup>1</sup>H NMR

Marcos Vinícius de M. Ribeiro, Nivaldo Boralle, Helena R. Pezza, Leonardo Pezza

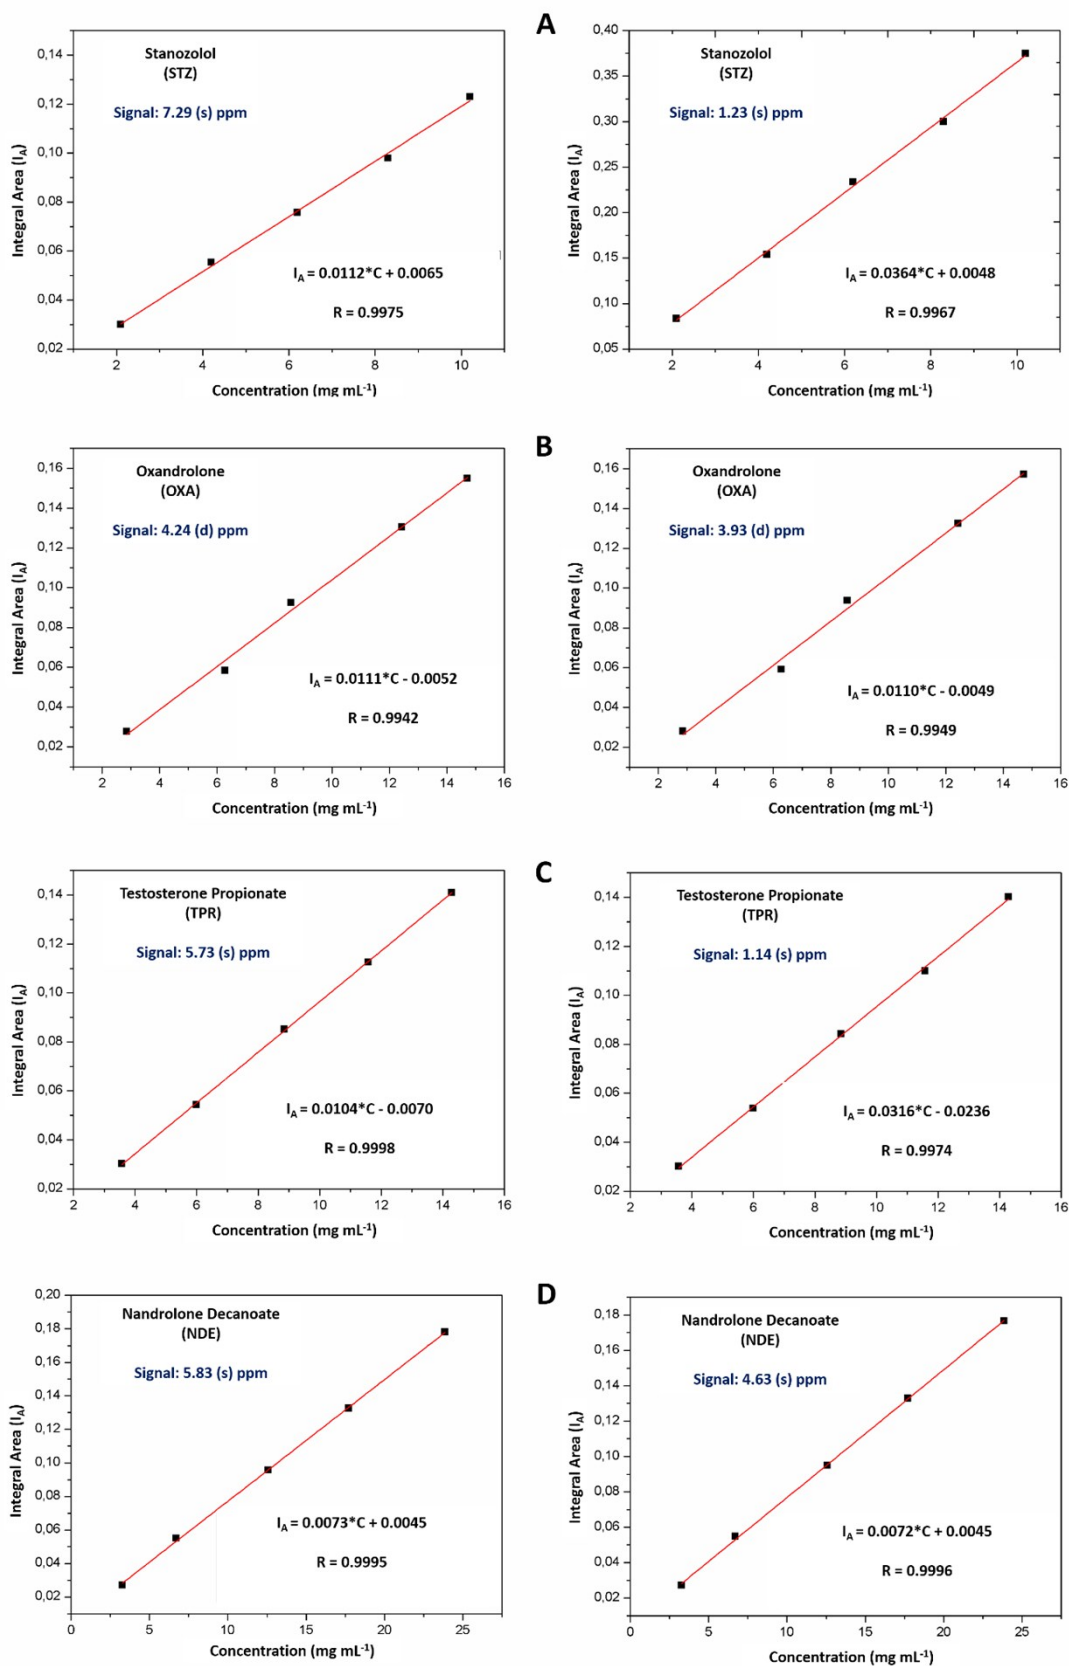

Figure S1 - Analytical curves for the NMR determinations: A) stanazolol, B) oxandrolone, C) testosterone propionate, D) nandrolone decanoate. Number of replicates for each point of the curve ( $n = 3$ ).

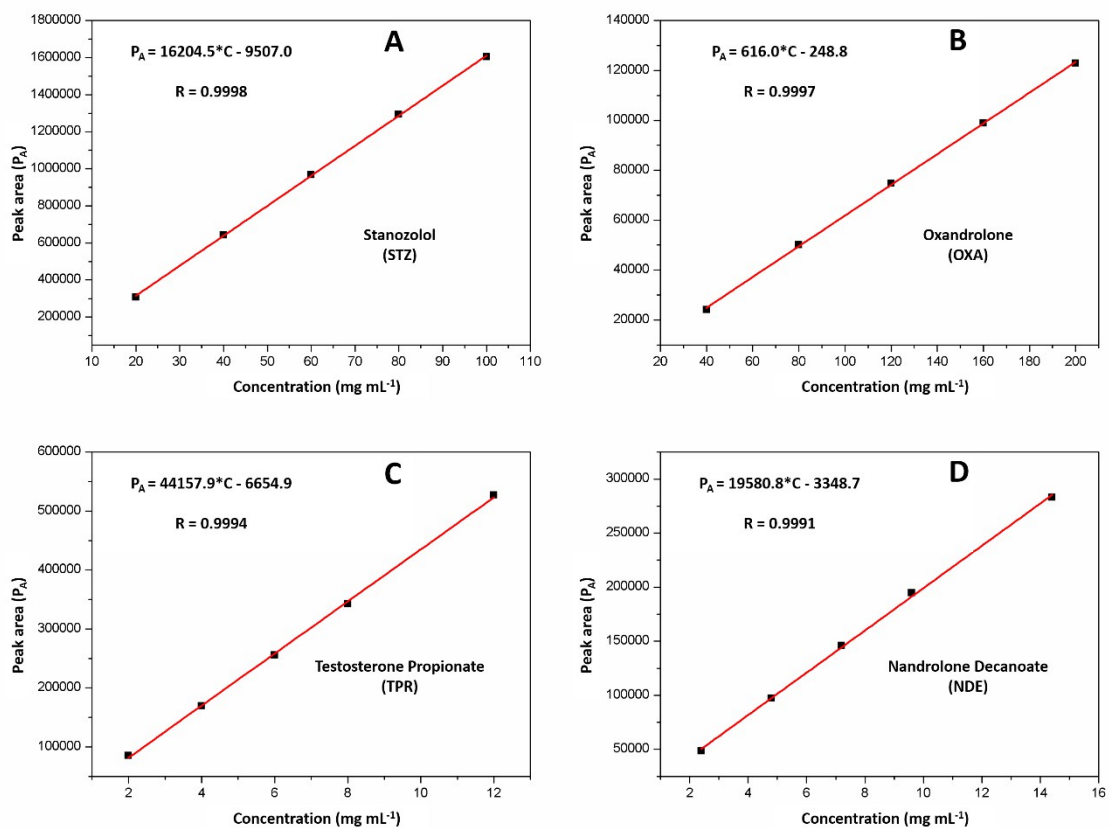

Figure S2 - Analytical curves for the HPLC determinations: A) stanozolol, B) oxandrolone, C) testosterone propionate, D) nandrolone decanoate. Number of replicates for each point of the curve (n = 3).

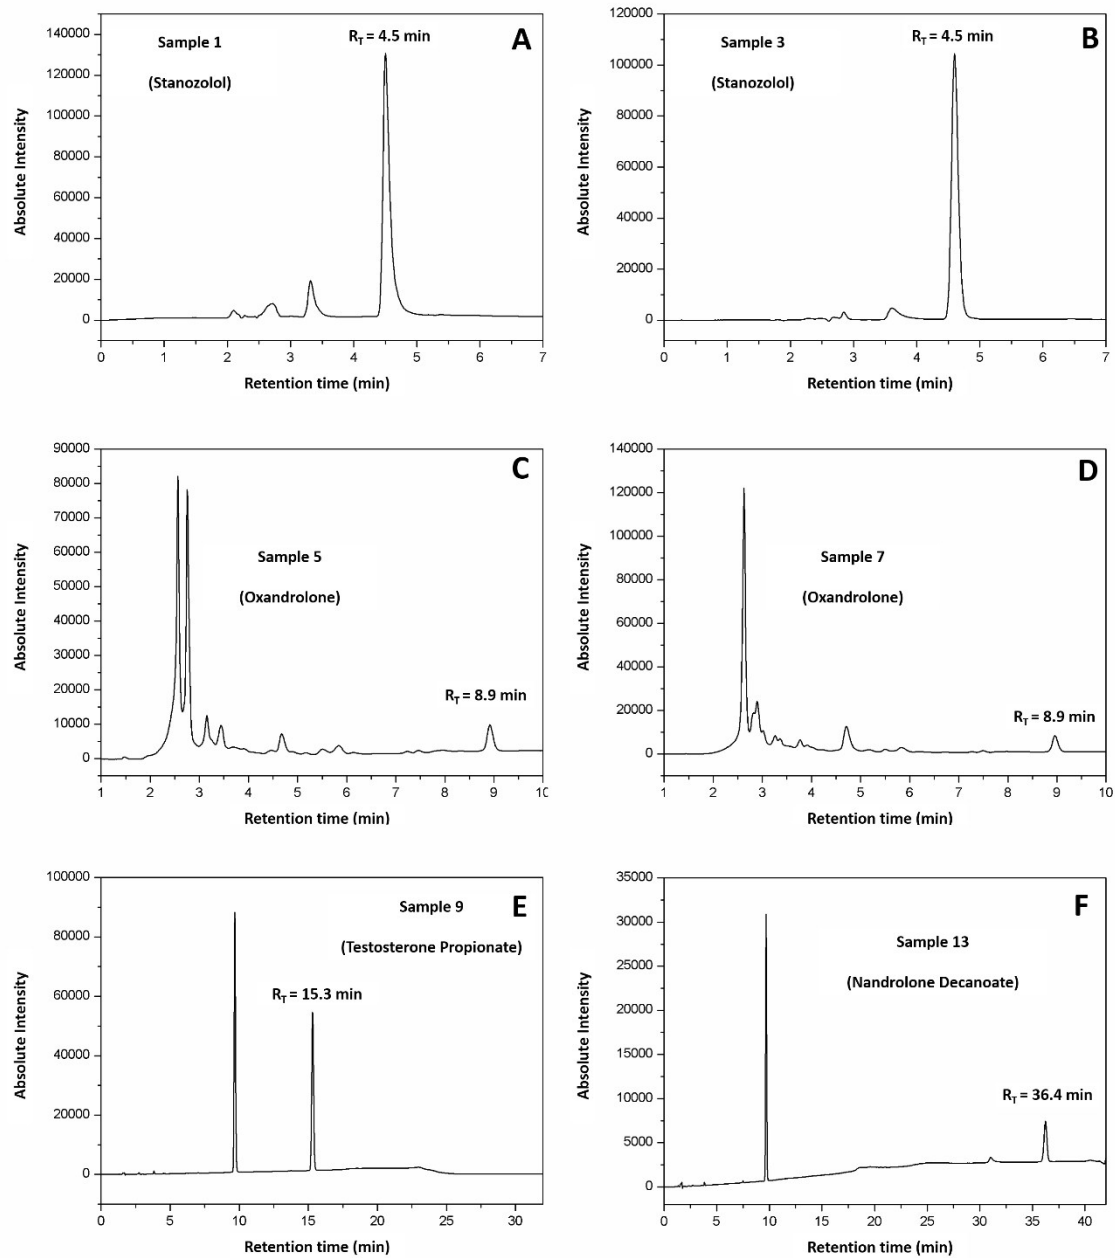

Figure S3 - HPLC chromatograms of the samples: A) Sample 1 (STZ), B) Sample 3 (STZ), C) Sample 5 (OXA), D) Sample 7 (OXA), E) Sample 9 (TPR), F) Sample 13 (NDE).
